# Supplementary material for: Pseudomonas Bacteremia in a Tertiary Hospital and Factors Associated with Mortality
Source: MDPI journal article supplement (doi:10.3390/antibiotics12040670), 2023-03-29
Supplement: s1 [file s1]

**Table S1.** Microbiology of *Pseudomonas* strains isolated from patients' blood cultures.

| Pathogen                             | Number of isolates (% for that specific year) |            |            |            |            |            |            |            |             |
|--------------------------------------|-----------------------------------------------|------------|------------|------------|------------|------------|------------|------------|-------------|
|                                      | 2015                                          | 2016       | 2017       | 2018       | 2019       | 2020       | 2021       | 2022       | 2015-2022   |
| <i>P. aeruginosa</i>                 | 40 (88.89)                                    | 46 (90.20) | 53 (88.33) | 45 (90.00) | 48 (85.71) | 51 (75.00) | 39 (86.67) | 35 (79.55) | 357 (85.20) |
| <i>P. alcaligenes</i>                | 0 (0.00)                                      | 0 (0.00)   | 0 (0.00)   | 0 (0.00)   | 0 (0.00)   | 1 (1.47)   | 1 (2.22)   | 0 (0.00)   | 2 (0.48)    |
| <i>P. fluorescens</i>                | 0 (0.00)                                      | 1 (1.96)   | 1 (1.67)   | 0 (0.00)   | 0 (0.00)   | 1 (1.47)   | 0 (0.00)   | 1 (2.27)   | 4 (0.95)    |
| <i>P. luteola</i>                    | 0 (0.00)                                      | 0 (0.00)   | 0 (0.00)   | 0 (0.00)   | 0 (0.00)   | 0 (0.00)   | 0 (0.00)   | 1 (2.27)   | 1 (0.24)    |
| <i>P. mendocina</i>                  | 0 (0.00)                                      | 0 (0.00)   | 0 (0.00)   | 0 (0.00)   | 1 (1.79)   | 1 (1.47)   | 0 (0.00)   | 0 (0.00)   | 2 (0.48)    |
| <i>P. oleovorans</i>                 | 0 (0.00)                                      | 0 (0.00)   | 0 (0.00)   | 0 (0.00)   | 0 (0.00)   | 1 (1.47)   | 0 (0.00)   | 1 (2.27)   | 2 (0.48)    |
| <i>P. oryzae</i>                     | 0 (0.00)                                      | 1 (1.96)   | 2 (3.33)   | 4 (8.00)   | 4 (7.14)   | 3 (4.41)   | 2 (4.44)   | 1 (2.27)   | 17 (4.06)   |
| <i>P. putida</i>                     | 3 (6.67)                                      | 3 (5.88)   | 3 (5.00)   | 0 (0.00)   | 3 (5.36)   | 8 (11.76)  | 3 (6.67)   | 3 (6.81)   | 26 (6.21)   |
| <i>P. stutzeri</i>                   | 2 (4.44)                                      | 0 (0.00)   | 1 (1.67)   | 1 (2.00)   | 0 (0.00)   | 2 (2.94)   | 0 (0.00)   | 2 (4.54)   | 8 (1.91)    |
| All<br><i>Pseudomonas</i><br>strains | 45 (10.73)                                    | 51 (12.17) | 60 (14.32) | 50 (11.93) | 56 (13.37) | 68 (16.23) | 45 (10.74) | 44 (10.50) | 419 (100)   |

**Table S2.** Microbiology of *Pseudomonas* strains isolated from patients' blood cultures in regards to acquisition.

| Pathogen                       | Community-acquired (%) | Hospital-acquired (%) | p      |
|--------------------------------|------------------------|-----------------------|--------|
| <i>P. aeruginosa</i>           | 81 (90)                | 276 (83.89)           | 0.1806 |
| <i>P. alcaligenes</i>          | 0 (0.00)               | 2 (0.61)              | 1.0000 |
| <i>P. fluorescens</i>          | 1 (1.11)               | 3 (0.91)              | 1.0000 |
| <i>P. luteola</i>              | 0 (0.00)               | 1 (0.30)              | 1.0000 |
| <i>P. mendocina</i>            | 1 (1.11)               | 1 (0.30)              | 0.3839 |
| <i>P. oleovorans</i>           | 0 (0.00)               | 2 (0.61)              | 1.0000 |
| <i>P. oryzae</i>               | 3 (3.33)               | 14 (4.26)             | 1.0000 |
| <i>P. putida</i>               | 1 (1.11)               | 25 (7.60)             | 0.0240 |
| <i>P. stutzeri</i>             | 3 (3.33)               | 5 (1.52)              | 0.3770 |
| All <i>Pseudomonas</i> strains | 90 (21.48)             | 329 (78.52)           | NA     |

NA: not applicable

**Table S3.** Microbiology of *Pseudomonas* strains isolated from patients' blood cultures in regards to whether the patient was hospitalized in a ward or in the intensive care unit.

| Pathogen                       | Medical wards (%) | Surgical wards (%) | ICU (%)     | p*     |
|--------------------------------|-------------------|--------------------|-------------|--------|
| <i>P. aeruginosa</i>           | 125 (88.03)       | 65 (85.53)         | 167 (83.08) | 0.2715 |
| <i>P. alcaligenes</i>          | 2 (1.41)          | 0 (0.00)           | 0 (0.00)    | 0.4996 |
| <i>P. fluorescens</i>          | 2 (1.41)          | 1 (1.32)           | 1 (0.50)    | 0.6244 |
| <i>P. luteola</i>              | 0 (0.00)          | 0 (0.00)           | 1 (0.50)    | 0.4797 |
| <i>P. mendocina</i>            | 2 (1.41)          | 0 (0.00)           | 0 (0.00)    | 0.4996 |
| <i>P. oleovorans</i>           | 0 (0.00)          | 0 (0.00)           | 2 (1.00)    | 0.2295 |
| <i>P. oryzihabitans</i>        | 2 (1.41)          | 5 (6.58)           | 10 (4.98)   | 0.4593 |
| <i>P. putida</i>               | 5 (3.52)          | 5 (6.58)           | 16 (7.96)   | 0.1623 |
| <i>P. stutzeri</i>             | 4 (2.82)          | 5 (6.58)           | 4 (1.99)    | 1.000  |
| All <i>Pseudomonas</i> strains | 142 (33.89)       | 76 (18.14)         | 201 (47.97) | NA     |

\* shows statistical comparison among strains in the ICU and the wards (medical and surgical combined)  
ICU: intensive care unit; NA: not applicable

**Table S4.** Antimicrobial resistance of *Pseudomonas aeruginosa* strains isolated from patients' blood cultures in regards to whether bacteremia was community or hospital acquired.

| Antibacterial | Community-acquired (%) | Hospital-acquired (%) | p      |
|---------------|------------------------|-----------------------|--------|
| Amikacin      | 13 (14.44)             | 48 (14.59)            | 1.0000 |
| Aztreonam     | 15 (16.67)             | 91 (27.74)            | 0.0396 |
| Cefepime      | 15 (16.67)             | 69 (20.97)            | 0.4576 |
| Ceftazidime   | 16 (17.78)             | 77 (23.40)            | 0.3164 |
| Colistin      | 2 (2.22)               | 6 (1.82)              | 0.6828 |
| Gentamicin    | 12 (13.33)             | 41 (12.46)            | 0.8582 |
| Meropenem     | 11 (12.22)             | 79 (24.01)            | 0.0198 |
| Piperacillin  | 17 (18.89)             | 76 (23.10)            | 0.4745 |
| Ticarcillin   | 25 (27.78)             | 131 (39.82)           | 0.0372 |
| Tobramycin    | 13 (14.44)             | 57 (17.33)            | 0.6327 |
| Ciprofloxacin | 18 (22.78)             | 58 (19.66)            | 0.5321 |
| Pefloxacin    | 19 (26.39)             | 59 (22.26)            | 0.5285 |

**Table S5.** Antimicrobial resistance of *Pseudomonas aeruginosa* strains isolated from patients' blood cultures in regards to whether the patient was hospitalized in a ward or in the intensive care unit.

| Antibacterial | Medical wards (%) | Surgical wards (%) | Wards (combined) (%) | ICU (%)    | p*     |
|---------------|-------------------|--------------------|----------------------|------------|--------|
| Amikacin      | 25 (20.00)        | 7 (10.77)          | 32 (16.84)           | 29 (17.37) | 1.0000 |
| Aztreonam     | 35 (28.23)        | 7 (10.77)          | 42 (22.22)           | 48 (28.74) | 0.1794 |
| Cefepime      | 30 (24.00)        | 8 (12.31)          | 38 (20.00)           | 40 (23.95) | 0.3725 |
| Ceftazidime   | 33 (26.40)        | 7 (10.77)          | 40 (21.05)           | 43 (25.75) | 0.3167 |
| Colistin      | 0 (0.00)          | 1 (1.54)           | 1 (0.53)             | 2 (1.20)   | 0.6012 |
| Gentamicin    | 23 (18.40)        | 5 (7.69)           | 28 (14.74)           | 23 (13.77) | 0.8798 |
| Meropenem     | 30 (24.00)        | 10 (15.38)         | 40 (21.05)           | 42 (25.15) | 0.3793 |
| Piperacillin  | 31 (24.80)        | 9 (13.85)          | 40 (21.05)           | 45 (26.95) | 0.2138 |
| Ticarcillin   | 43 (34.40)        | 15 (23.08)         | 58 (30.53)           | 65 (38.92) | 0.1180 |
| Tobramycin    | 25 (20.00)        | 9 (13.85)          | 34 (17.89)           | 35 (20.96) | 0.5031 |
| Ciprofloxacin | 29 (27.36)        | 9 (14.75)          | 38 (22.75)           | 35 (23.18) | 1.0000 |
| Pefloxacin    | 32 (34.04)        | 9 (15.79)          | 41 (27.15)           | 33 (24.09) | 0.5906 |

\* shows statistical comparison among strains in the ICU and the wards (medical and surgical combined)  
ICU: intensive care unit

**Table S6.** Antimicrobial resistance of the different *Pseudomonas* species isolated from patients' blood.

| Antimicrobial resistance (%) | <i>Pseudomonas aeruginosa</i> (n=357) | <i>Pseudomonas alcaligenes</i> (n=2) | <i>Pseudomonas fluorescens</i> (n=4) | <i>Pseudomonas luteola</i> (n=1) | <i>Pseudomonas mendocina</i> (n=2) | <i>Pseudomonas oleovorans</i> (n=2) | <i>Pseudomonas oryzihabitans</i> (n=17) | <i>Pseudomonas putida</i> (n=26) | <i>Pseudomonas stutzeri</i> (n=8) |
|------------------------------|---------------------------------------|--------------------------------------|--------------------------------------|----------------------------------|------------------------------------|-------------------------------------|-----------------------------------------|----------------------------------|-----------------------------------|
| Amikacin                     | 17,086834                             | 0,000000                             | 0,000000                             | 0,000000                         | 0,000000                           | 0,000000                            | 0,000000                                | 0,000000                         | 0,000000                          |
| Aztreonam                    | 25,280900                             | 50,000000                            | 50,000000                            | 0,000000                         | 0,000000                           | 50,000000                           | 23,529411                               | 26,923077                        | 12,500000                         |
| Cefepime                     | 21,848740                             | 0,000000                             | 25,000000                            | 0,000000                         | 0,000000                           | 0,000000                            | 11,764706                               | 11,538462                        | 0,000000                          |
| Ceftazidime                  | 23,249300                             | 50,000000                            | 25,000000                            | 0,000000                         | 0,000000                           | 0,000000                            | 17,647058                               | 15,384615                        | 12,500000                         |
| Colistin                     | 0,84033614                            | 0,000000                             | 25,000000                            | 100,000000                       | 0,000000                           | 50,000000                           | 0,000000                                | 0,000000                         | 25,000000                         |
| Gentamicin                   | 14,285714                             | 0,000000                             | 25,000000                            | 0,000000                         | 0,000000                           | 0,000000                            | 0,000000                                | 3,8461537                        | 0,000000                          |
| Meropenem                    | 22,969187                             | 0,000000                             | 0,000000                             | 0,000000                         | 0,000000                           | 0,000000                            | 0,000000                                | 23,076923                        | 25,000000                         |
| Piperacillin                 | 23,809525                             | 0,000000                             | 25,000000                            | 0,000000                         | 0,000000                           | 0,000000                            | 11,764706                               | 15,384615                        | 12,500000                         |
| Ticarcillin                  | 34,453780                             | 50,000000                            | 75,000000                            | 0,000000                         | 50,000000                          | 0,000000                            | 29,411764                               | 80,769230                        | 25,000000                         |
| Tobramycin                   | 19,327730                             | 0,000000                             | 0,000000                             | 0,000000                         | 0,000000                           | 0,000000                            | 0,000000                                | 3,8461537                        | 0,000000                          |
| Ciprofloxacin                | 22,955975                             | 0,000000                             | 25,000000                            | 0,000000                         | 0,000000                           | 50,000000                           | 0,000000                                | 4,347826                         | 0,000000                          |
| Pefloxacin                   | 25,694445                             | 0,000000                             | 33,333332                            | 0,000000                         | 0,000000                           | 0,000000                            | 0,000000                                | 9,523809                         | 16,666666                         |
